# Supplementary material for: Investigating the efficacy of acupuncture in treating patients with metabolic-associated fatty liver disease: a protocol for a randomised controlled clinical trial
Source: PubMed Central journal article supplement — BMJ Open. 2024 Sep 13;14(9):e081293. doi: 10.1136/bmjopen-2023-081293 (PMC11733782; doi:10.1136/bmjopen-2023-081293), 2024-09-13
Supplement: bmjopen-14-9-s001.pdf [file bmjopen-14-9-s001.pdf]

## 知情同意书·知情告知页

尊敬的先生/女士：

我们将邀请您参加一项“针刺治疗代谢相关脂肪性肝病的随机对照试验”的临床研究。

在您决定是否参加这项研究之前，请尽可能仔细阅读以下内容，它可以帮助您了解该项研究以及为何要进行这项研究，研究的程序和期限，参加本研究后可能给您带来的益处、风险和不适。如果您愿意，您也可以和您的亲属、朋友一起讨论，或者请您的医生给予解释，帮助您做出决定。

### 研究介绍

#### 一、研究背景和研究目的

代谢相关脂肪性肝病(Metabolic-associated fatty liver disease, MAFLD)是肥胖和代谢综合征(Metabolic syndrome, MetS)累及肝脏的表现。治疗 MAFLD 的首要目标为减重和改善胰岛素抵抗 (insulin resistance, IR)，MAFLD 患者 1 年内减重 5%以上可以改善血液生化指标和肝脏组织学病变。但目前无足够证据推荐减肥手术治疗非酒精性脂肪性肝炎(Non-alcoholic steatohcpatitis, NASH)。目前 MAFLD 的发病率高和治疗药物缺乏，开发治疗 MAFLD 的治疗手段具有广阔的临床意义。

针灸治疗“肝癖”有其独特的优势，主要原理是通过经络配穴达到疏肝理气、健脾化痰、活血化瘀的作用。因此，为进一步评估在 MAFLD 患者中，针刺治疗的疗效和安全性，课题组设计了本项多中心、随机、单盲、假针灸、平行对照临床研究，预期将形成针刺治疗 MAFLD 的高质量循证医学证据，为 MAFLD 的治疗提供新的选择。

本研究采用模拟针刺感的安慰针灸为对照组。模拟针刺感对照使用 Park 假针刺装置 (park sham device, PSD) 在穴位处将使受试者认为刺破皮肤，但实际不刺破是目前较为理想的安慰针灸对照方法。本研究的目的是为了评价针刺治疗代谢相关脂肪性肝病的有效性和安全性，其研究结果将用于评价针刺干预 MAFLD 的疗效和安全性。

本研究将在 3 个研究中心进行，预计共有 98 名受试者自愿参加，我院将有 49 名受试者自愿参加。

本研究项目是由自筹经费资助。本研究项目由上海中医药大学附属曙光医院伦理委员会审议，是遵从中国国家相关法规和赫尔辛基宣言等保护受试者权益的伦理原则的。

#### 二、入选标准和排除标准

入选标准：1.年龄 18-70 周岁(含)，性别不限；2.符合 MAFLD 的西医诊断标准；3.中医辨证为湿浊内停证、湿热蕴结证、痰瘀互结证；4.BMI $\geq 23\text{kg/m}^2$ ；5.采用磁共振成像衍生的质子密度脂肪分数(MRI-PDFF)诊断 MAFLD (MRI-PDFF $\geq 11\%$ )；6.患者同意加入本次临床研究，自愿签订了知情同意书，并同意按照研究方案的要求参加所有的访视、检查、治疗。

排除标准:1.通过病史、实验室检测怀疑有其它原因的肝胆疾病，包括但不限于：乙型或

丙型肝炎病毒感染、酒精性肝病、药物性肝病、自身免疫性肝炎、肝硬化、原发性硬化性胆管炎、Wilson 病、 $\alpha$ 1-抗胰蛋白酶缺乏症、肝癌(或有肝癌家族史)等；2.严重肝功能损伤，定义为谷丙转氨酶(ALT) $\geq 2.5$  倍正常值上限；3.提示存在肝硬化或肝功能失代偿的临床证据；4.严重肾功能不全，定义为血肌酐(Scr) $\geq 178\mu\text{mol/L}$ ，或肾小球滤过率(eGFR) $< 60\text{ml/min}$ ；5.合并有心脑血管、泌尿和造血系统等严重原发性疾病、恶性肿瘤、其他严重合并症或精神病患者；6.合并 1 型糖尿病或未受控制的 2 型糖尿病，定义为 HbA1c $\geq 9.5\%$ ，或入组前 2 月调整过降糖药物，或既往发生过严重低血糖事件；7.合并甲状腺疾病，包括甲亢、甲减、亚临床甲减；8.有 MRI 扫描禁忌，包括但不限于：重度幽闭恐惧症、内耳植入物、起搏器或其他植入的心律管理设备、与 MRI 不兼容的颅内动脉瘤夹、任何其他金属、非 MRI 兼容的植入设备(例如胰岛素泵、髓关节置换术)、尚未移除的眶内金属碎片病史、超过扫描仪功能的体重或腰围等；9.既往接受过针灸治疗者；10.妊娠和哺乳期妇女，及拒绝在整个研究过程中保持研究者所认可避孕措施的具有怀孕可能的妇女；11.近 3 个月参加过其他临床试验；12.不能遵医嘱执行生活方式干预者；13.研究者认为存在不适合参加本研究的其他情况。

### 三、如果参加研究将需要做什么？

1、如果您符合入选标准并同意参加，将按以下步骤进行研究：

基于随机化原则，您会接受针刺/安慰针刺治疗，您需要每周针刺 3 次，治疗持续 12 周，而后为 12 周的随访。我们每 3 周设置了一个访视点，在这个时间点您需要进行问卷和/或理化检查，如实向医生反映病情变化。希望您按照医生的说明配合。您必须按医生和您约定的随访时间来医院就诊。在研究期间您不能使用治疗 MAFLD 的其它药物。如您需要进行其它治疗，请事先与您的医生取得联系。具体安排如下：

#### 1.1 第 0 周/基线

- ① 随机化分组，并接受第一次针灸治疗；
- ② 对受试者进行疗效性观察项目的检查：肝功能、血常规、血脂代谢、hs-CRP、HOMA-IR、脂肪细胞因子、身体测量、铜蓝蛋白、MRE。
- ③ 生物样本采集；
- ④ 对受试者进行安全性观察项目的检查：尿妊娠，不良事件记录；
- ⑤ 受试者生活干预措施宣教；
- ⑥ 记录合并用药。

## 1.2 治疗中/第 3 周

- ① 对受试者进行安全性观察项目的检查：不良事件记录；
- ② 对受试者进行疗效性观察项目的检查：身体测量；
- ③ 回收受试者生活干预措施执行记录日记卡并发放新的日记卡；
- ④ 记录合并用药。

## 1.3 治疗中/第 6 周

- ① 对受试者进行安全性观察项目的检查：不良事件记录；
- ② 对受试者进行疗效性观察项目的检查：肝功能、血常规、血脂代谢、hs-CRP、HOMA-IR、脂肪细胞因子、身体测量。
- ③ 回收受试者生活干预措施执行记录日记卡并发放新的日记卡；
- ④ 记录合并用药；
- ⑤ 生物样本采集。

## 1.4 治疗中/第 9 周

- ① 对受试者进行安全性观察项目的检查：不良事件记录；
- ② 对受试者进行疗效性观察项目的检查：身体测量；
- ③ 回收受试者生活干预措施执行记录日记卡并发放新的日记卡；
- ④ 记录合并用药。

## 1.5 治疗中/第 12 周

- ①对受试者进行安全性观察项目的检查：不良事件记录；
- ②对受试者进行疗效性观察项目的检查：MRI-PDFF、肝功能、血常规、血脂代谢、hs-CRP、HOMA-IR、脂肪细胞因子、身体测量、MRE。
- ③回收受试者生活干预措施执行记录日记卡并发放新的日记卡；
- ④记录合并用药；
- ⑤生物样本采集。

## 1.6 随访/第 24 周

- ① 对受试者进行安全性观察项目的检查：不良事件记录；
- ② 对受试者进行疗效性观察项目的检查：MRI-PDFF、肝功能、血常规、血脂代谢、hs-CRP、HOMA-IR、脂肪细胞因子、身体测量、MRE。
- ③ 回收受试者生活干预措施执行记录日记卡并发放新的日记卡；

- ④ 记录合并用药；
- ⑤ CRF 研究者签名。

## 2. 需要您配合的其他事项：

配合生活方式干预包括饮食建议及运动建议，具体如下：

饮食建议：根据《中国居民膳食指南》指导饮食结构，要求中等程度热量，限制晚餐热量和晚餐后进食。建议每日减少 2092~4184 KJ(500~1000 千卡)热量；调整膳食结构，建议适量脂肪和碳水化合物的平衡膳食，限制含糖饮料、糕点和深加工精致食品，增加全谷类食物、 $\omega$ -3 脂肪酸以及膳食纤维摄入。

运动项目：主要选择中等强度的有氧运动，包括中速步行(每分钟 120 步左右)、慢跑、骑自行车、游泳、广播体操、跳舞、打羽毛球等；具体可按照个人身体状态和爱好，因地制宜选择其中几种项目。

运动强度：一般情况，锻炼时心率或脉搏至少要维持在每分钟 100 次以上，但最高心率不宜超过 200 减去实际年龄。

运动时间：整个运动过程中可分为三个时期：一为热身期，约 5~8 分钟，老年人可适当延长，在此期内主要进行一些伸展性的、柔软的大肌群活动；二为锻炼期，约 20~30 分钟，老年人可适当缩短；三为冷却期，约占 8 分钟左右，可做一些舒缓运动，使身体逐步恢复到运动以前的状态。

运动频率：每周 4 次以上，累计锻炼时间至少 150 分钟。

## 四、参加研究的受益

参加本项临床研究，您的病情可能得到改善。您可以在该试验进行中获得更多与本疾病相关的医疗建议和指导。

您的参与，也将在针刺治疗代谢相关脂肪性肝病等方面做出贡献，对于本疾病的治疗及对于此类疾病的其他患者，具有社会意义。

## 五、参加研究的风险

本研究所用的针灸治疗，常见的不良反应有：

1. 针刺相关的不良事件：晕针、滞针、断针、难以忍受的针刺痛、局部血肿、感染和针后其他不适感包括针刺后遗痛、疲劳、心悸、头晕等症状。
2. 在研究期间，也许会出现其他一些不适，请立即告诉您的研究医师，他/她会对您出现的不适进行判断和医疗处理。

研究中您需按照研究者的要求时间点来访视，可能会对您带来不便。

## 六、参加研究的费用、补偿和赔偿

参加本研究针刺治疗同时您也会免费获得疾病相关健康宣教，研究结束后，您将获得一定的交通补贴（人民币 300 元）。

如您确实发生了与本研究有关的损伤，申办者/课题组将按照国家法律法规承担相应责任，并对试验相关的损害给予相应的补偿或赔偿。

如果您同时合并其他疾病所需的治疗和检查，将不在免费的范围之内。

## 七、个人信息是保密的吗？

您参加本项研究的信息均会记录在研究病历/病例报告表中。所有出现在原始医学记录中的研究结果（包括个人资料、化验单据等）均会在法律的允许范围内完全保密。您的名字不会出现在 CRF 表中，仅仅出现您的姓名拼音缩写和在您参加研究时分配的编号。相关研究总结、文章、公开刊物中，如有必要，也只会仅出现您的姓名拼音缩写和编号。

必要时，药品监督管理部门、伦理委员会或课题资助部门，按规定可以查阅参加研究的受试者资料。但未经允许，他们不会将参加研究的受试者资料用到其他的用途或泄露给其他的团体。

## 八、怎样获得更多的信息？

您可以在任何时间提出有关本项研究的任何问题。

您的医生将给您留下他/她的电话号码以便能回答您的问题。

如果在研究过程中有任何重要的新信息，可能影响您继续参加研究的意愿时，您的医生将会及时通知您。

## 九、可以自愿选择参加研究和中途退出研究

是否参加本研究完全取决于您的自愿。您可以拒绝参加此项研究，或在研究过程中的任何时间退出本研究。如果您选择退出此研究，您的受益将不会受到影响，也不会因此而受到歧视或报复。

您的医生或研究者出于对您的最大利益考虑，可能会随时中止您参加本项研究。

如果您因为任何原因从研究中退出，您可能被咨询有关您使用研究药物的情况。如果医生认为需要，您也可能被要求进行实验室检查和体格检查。您也可以拒绝，并不会因此受到歧视或报复。

如果您选择参加本项研究，我们希望您能够坚持完成全部研究过程。

如果您不参加本次研究，研究医生将为您提供可供选择的其他方式。（保肝、降脂等对症治疗）

## 十、现在该做什么？

是否参加本项研究由您自己决定。您可以和您的家人或者朋友讨论后再做出决定。

在您做出参加研究的决定前，请尽可能向您的医生询问有关问题，直至您对本项研究完全理解。

## 十一、伦理委员会

如果您有疑问或需要向除研究者以外的人员询问，请咨询上海曙光医院伦理委员会。

伦理委员会办公室：曙光医院东部行政二楼 伦理委员会办公室

联系电话：20256070

感谢您阅读以上材料。如果您决定参加本项研究，请告诉您的医生，他/她会为您安排一切有关研究的事务。

请您保留这份资料。

## 知情同意书•同意签字页

项目名称： 针刺治疗代谢相关脂肪性肝病的随机对照试验

项目来源：自筹经费

版本号：MAFLD-8.16

版本日期：2023 年 8 月 16 日

### 同意声明

我已经阅读了上述有关本研究的介绍，并且有机会就此项研究与医生讨论并提出问题。我提出的所有问题都得到了满意的答复。

我知道参加本研究可能产生的风险和受益。我知晓参加研究是自愿的，我确认已有充足时间进行考虑，而且明白：

- 我可以随时向医生咨询更多的信息。
- 我可以随时退出本研究，而不会受到歧视或报复，医疗待遇与权益不会受到影响。

我同样清楚，如果我中途退出研究，特别是由于治疗的原因使我退出研究时，我若将病情变化告诉医生，完成相应的体格检查和理化检查，这将对我本人和整个研究十分有利。

如果因患病的需要采取任何其他的药物治疗，我会在事先征求医生的意见，或在事后如实告诉医生。

我同意伦理委员会或课题资助部门代表查阅我的研究资料。

我将获得一份经过签名并注明日期的知情同意书副本。

最后，我决定同意参加本项研究，并保证尽量遵从医嘱。

受试者签名：\_\_\_\_\_ 日期：\_\_\_\_\_ 年 \_\_\_\_\_ 月 \_\_\_\_\_ 日

受试者联系电话：\_\_\_\_\_

---

我确认已向受试者解释了本研究的详细情况，包括其权利以及可能的受益和风险，并给其一份签署过的知情同意书副本。

研究者签名：\_\_\_\_\_ 日期：\_\_\_\_\_ 年 \_\_\_\_\_ 月 \_\_\_\_\_ 日

研究者联系电话：\_\_\_\_\_
