# Supplementary material for: Investigating the efficacy of acupuncture in treating patients with metabolic-associated fatty liver disease: a protocol for a randomised controlled clinical trial
Source: PubMed Central journal article supplement — BMJ Open. 2024 Sep 13;14(9):e081293. doi: 10.1136/bmjopen-2023-081293 (PMC11733782; doi:10.1136/bmjopen-2023-081293), 2024-09-13
Supplement: bmjopen-14-9-s002.pdf [file bmjopen-14-9-s002.pdf]

# 针刺治疗代谢相关脂肪性肝病的随机对照试验的附加知情同意书

项目名称：针刺治疗代谢相关脂肪性肝病的随机对照试验

申办者/研究者：高月求

尊敬的受试者：

请您仔细阅读本知情同意书并慎重做出是否同意您本人生物标本的保存和未来使用研究的决定，参加这部分研究完全是您自主的选择，当您的研究医生或者研究人员和您本人讨论知情同意书的时候，您可以让他/她给您解释您看不明白的地方。我们鼓励您在做出参与此项研究的决定之前，和您的家人及朋友进行充分讨论。您可以自主决定您的样本是否能够保存，保存年限，是否需要匿名化保存，以及将来可以用于那些研究。

## 第一部分 受试者须知

一．收集标本的目的：

我们在您现在参加的题目为“针刺治疗代谢相关脂肪性肝病的随机对照试验”的研究中收集了您的血液及粪便标本，现在我们希望保存您在主研究中的剩余标本，以备上海中医药大学附属曙光医院肝病科可能在将来的研究中使用。

二．收集标本的用途

您的标本将来可能会被用于代谢相关性脂肪肝方面的研究，直至标本用完或您要求储存的年限。使用您的标本将有利于我们制定代谢相关性脂肪肝的诊疗决策。

目前，您的生物标本是可以追溯到您个人信息的，故您需决定希望研究者将您的标本是匿名化储存（通过对样本进行编码，样本不能追溯到您的个人信息），还是非匿名化储存。

如果生物标本是匿名化储存的，您提供的样本将被编码，即采用代码号识别样本而非您的名字或其他个人信息。只有个别研究者及授权的其他人员才能够从该代码识别您的姓名。未来进行研究的其他研究者或您个人将不能得知您标本用于哪些研究，也不能知道哪些数据是利用

您的标本产生的。

如果生物标本是非匿名化储存的，如果研究的结果直接与临床相关（如确定您标本中含有的某种基因与某种疾病直接相关），研究者有义务将这一信息告知您。同时，您应该考虑到潜在的后果以及如果一旦信息传播出去，对您的家人和亲戚带来的潜在的风险。例如，当您在购买人寿保险或医疗保险时，您必须公开这些可能影响您健康评估的研究结果，此举会为您带来不利后果。

请衡量以上方面之后再决定您的标本是否需要匿名化保存。

您的标本将来仅会用于上海中医药大学附属曙光医院肝病科的研究者进行的科学研究，不会被用于商业目的。研究者每次研究使用您的剩余标本前，必须获得伦理委员会的批准。

### 三．拒绝和撤回同意

您有权拒绝剩余标本被保存，拒绝签署本知情同意不会影响您的任何权益，也不会影响您的正常治疗。今后您可随时通过联系您的研究者，撤回同意，要求立即销毁您的标本。如果您有任何问题，请联系：黄凌鹰，联系电话：13764587034。

### 四．保密

今后您标本涉及研究的结果可能会在医学杂志上发表，但是我们会按照法律的要求为您的研究记录保密。研究受试者的个人信息将受到严格保密，除非应相关法律要求，您的个人信息不会被泄露。必要时，政府管理部门和一院伦理委员会及其他相关研究人员可以按规定查阅您的资料。

您如果对以上信息具有疑问，你可以随时提出疑问，我们会及时向您作出解释。

## 第二部分 签字页

在主研究结束时，如果我为该研究提供的（标本种类，如血液、粪便等）标本未使用或有

剩余：(勾选以下方框中的选项)

- ☐ 我希望我的血液及粪便标本被立即销毁；
- ☐ 我希望我的血液及粪便标本在\_\_年后被销毁；
- ☐ 我同意我的血液及粪便标本无限期被保存；

**并且（如果标本被储存）**

- ☐ 我同意我的血液及粪便标本被储存，并且将来仅用于和本知情提到的研究方向一致的研究；
- ☐ 我同意我的血液及粪便标本被储存，并且将来仅用于被批准的任何目的的研究；
- ☐ 我同意我的血液及粪便标本被储存，并且将来仅用于以下类型的研究，  
如：\_\_\_\_\_；

**并且**

- ☐ 我希望我的血液及粪便标本被匿名化保存；
- ☐ 我希望我的血液及粪便标本无需匿名化保存；

我的相关问题和疑问已经得到满意答复。我自愿同意我的标本按以上方式和目的被保存。

受试者签名：\_\_\_\_\_日期：\_\_\_\_\_

如果受试者不识字，一名识字的见证人必须签名。

我目睹了对潜在受试者的知情同意过程，我确认受试者的知情同意是自愿的。

见证人签名：\_\_\_\_\_ 日期：\_\_\_\_\_

**研究者声明**

我已经准确的向潜在受试者解释了受试者须知内容。

我确认受试者有机会针对标本储存的形式和方式进行提问，并且我对受试者的提问做出了详细的回答。我确认受试者是自愿签署知情同意的。一份知情同意书副本已经提供给受试者。

研究者签名：\_\_\_\_\_ 日期：\_\_\_\_\_
